# Supplementary material for: Sirtuin 3 Alleviates Diabetic Cardiomyopathy by Regulating TIGAR and Cardiomyocyte Metabolism
Source: PubMed Central journal article supplement — J Am Heart Assoc. 2021 Feb 15;10(5):e018913. doi: 10.1161/JAHA.120.018913 (PMC8174281; doi:10.1161/jaha.120.018913), 2021-02-15

# **SUPPLEMENTAL MATERIAL**

**Figure S1. Results from Western blot analysis demonstrating that exposure of H9c2 cells to Mannitol for 72 hours had no effects on the expression of SIRT3, p53-acetylation, p53, PFKFB3 and TIGAR. (n = 4 cell lines).**

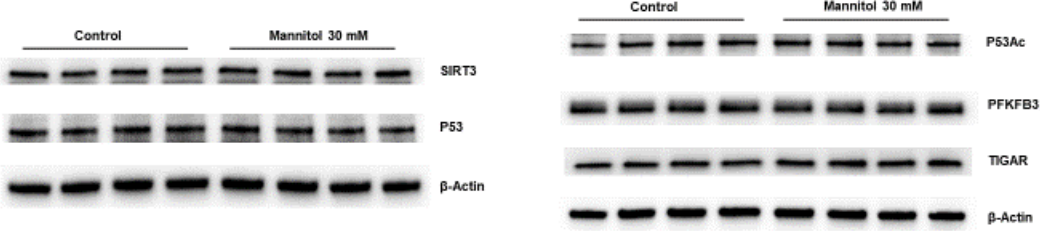

**Figure S2. A and B. Results from Immunofluorescence and Western blot analysis demonstrating that exposure to Ad-SIRT3 for 48 hours led to a significant increase in SIRT3 expression.**

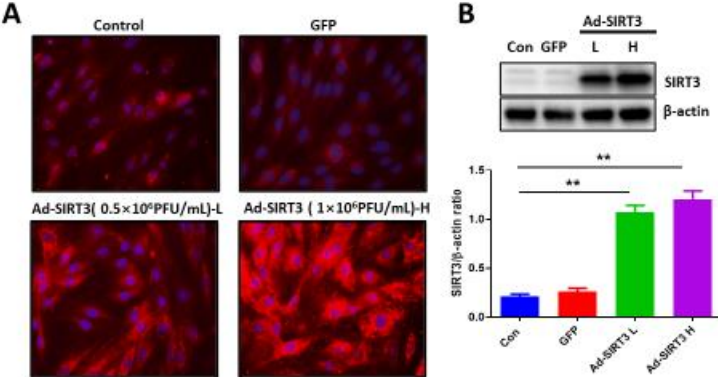

All data represent mean  $\pm$  SD (n = 3, \*\*p < 0.01).

**Figure S3. A and B. Fluorescent immunohistochemical analysis confirmed the SIRT3 in the Ad-SIRT3 treated db/db mice hearts were co-localized with Troponin on cardiomyocytes and Isolectin B4 (IB4) on ECs.**

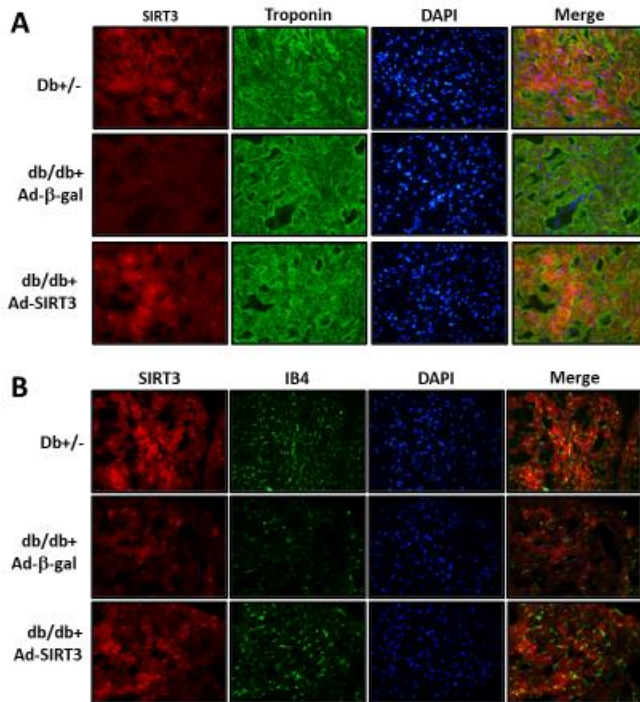

Supplement: JAH3-10-e018913-s001.pdf [file JAH3-10-e018913-s001.pdf]
